# Supplementary material
Source: Oxford University Press journal article supplement (doi:10.1093/g3journal_jkac111)
Supplement: jkac111_supplemental_table_s1.pdf [file jkac111_supplemental_table_s1.pdf]

**Supplementary Table S1.** Average distance (in bp) along each chromosome. Standard deviation among chromosomes is 2,226bp.

| <b>Chromosome</b> | <b>Average distance (bp)</b> |
|-------------------|------------------------------|
| 1                 | 15712                        |
| 2                 | 15423                        |
| 3                 | 14872                        |
| 4                 | 14717                        |
| 5                 | 14863                        |
| 6                 | 14499                        |
| 7                 | 15249                        |
| 8                 | 13781                        |
| 9                 | 15774                        |
| 10                | 11391                        |
| 11                | 13353                        |
| 12                | 13914                        |
| 13                | 12189                        |
| 14                | 13565                        |
| 15                | 14439                        |
| 16                | 15248                        |
| 17                | 17126                        |
| 18                | 12730                        |
| 19                | 22121                        |
| 20                | 12151                        |
| 21                | 11875                        |
| 22                | 14159                        |
