# Supplementary material
Source: Oxford University Press journal article supplement (doi:10.1093/g3journal_jkac111)
Supplement: jkac111_supplemental_table_s2.pdf [file jkac111_supplemental_table_s2.pdf]

**Supplementary Table S2. Average ancestries as estimated by ADMIXTURE with K=3. Latino populations means and standard deviation for major ancestral components.**

| Population   | Average ancestries (K=3) |          |         | Standard Deviation |          |         |
|--------------|--------------------------|----------|---------|--------------------|----------|---------|
|              | Native American          | European | African | Native American    | European | African |
| Peruvian     | 0.773                    | 0.193    | 0.034   | 0.151              | 0.096    | 0.031   |
| Mexican      | 0.499                    | 0.447    | 0.054   | 0.165              | 0.140    | 0.018   |
| Colombian    | 0.285                    | 0.622    | 0.093   | 0.085              | 0.109    | 0.042   |
| Puerto Rican | 0.161                    | 0.689    | 0.151   | 0.034              | 0.086    | 0.050   |
| Brazilian    | 0.102                    | 0.649    | 0.249   | 0.049              | 0.277    | 0.105   |
