# Supplementary material
Source: Oxford University Press journal article supplement (doi:10.1093/g3journal_jkac111)
Supplement: jkac111_supplemental_table_s3.pdf [file jkac111_supplemental_table_s3.pdf]

**Supplementary Table S3. Genic markers identified in putatively positive selection using iHS.** TSS: transcription starting site, TMRCA: time to most recent common ancestor.

YBP: years before present.

| Chromosome | Position (bp) | rsID       | Gene       | Exon/Intron # | Area   | TSS Distance (bp) | Normalized iHS | Population | TMRCA (YBP) |
|------------|---------------|------------|------------|---------------|--------|-------------------|----------------|------------|-------------|
| chr1       | 36027711      | rs2074676  | NCDN       | 4             | INTRON | 4318              | 4.18059        | PUR        | 7172        |
| chr1       | 53480745      | rs7529265  | SCP2       | 11            | INTRON | 87787             | 4.04565        | PEL        | 10053       |
| chr1       | 55984933      | rs12757934 | AL603840.1 | 1             | INTRON | 189972            | 3.85406        | MXL        | 26226       |
| chr1       | 55984933      | rs12757934 | AL603840.1 | 1             | INTRON | 189972            | 3.56552        | PEL        | 17786       |
| chr1       | 57535198      | rs3738556  | DAB1       | 5             | INTRON | 221539            | 3.39702        | MXL        | 86232       |
| chr1       | 87447902      | rs10782588 | HS2ST1     | 1             | INTRON | 67545             | 4.03481        | CLM        | 12843       |
| chr1       | 111857485     | rs2820072  | CHIA       | 4             | INTRON | 4489              | 3.63988        | MXL        | 24077       |
| chr1       | 162103270     | rs10494368 | NOS1AP     | 1             | INTRON | 63704             | 3.66045        | MXL        | 10499       |
| chr1       | 162106150     | rs10918732 | NOS1AP     | 1             | INTRON | 66584             | 3.66045        | MXL        | 10499       |
| chr1       | 166594960     | rs486929   | FMO9P      | 5             | INTRON | 13253             | 3.55818        | MXL        | 16588       |
| chr1       | 166876079     | rs7552562  | ILDR2      | 2             | INTRON | 1238              | 3.44066        | PEL        | 10223       |
| chr1       | 167126250     | rs869714   | GPA33      | 1             | INTRON | 9466              | 3.64324        | MXL        | 32407       |
| chr1       | 167198536     | rs1021621  | POU2F1     | 1             | INTRON | 8409              | 3.51325        | PEL        | 7358        |
| chr1       | 176453688     | rs2223579  | PAPPA2     | 1             | INTRON | 21381             | 3.39486        | MXL        | 6341        |
| chr1       | 176459709     | rs742473   | PAPPA2     | 1             | INTRON | 27402             | 3.96167        | MXL        | NA          |
| chr1       | 179751937     | rs7531276  | FAM163A    | 1             | INTRON | 39639             | 3.48654        | PEL        | 4603        |
| chr1       | 179892125     | rs1298479  | TOR1AIP1   | 10            | EXON   | 40678             | 4.17398        | CLM        | 20962       |
| chr1       | 179892125     | rs1298479  | TOR1AIP1   | 10            | EXON   | 40678             | 4.23861        | MXL        | 8967        |
| chr1       | 179892125     | rs1298479  | TOR1AIP1   | 10            | EXON   | 40678             | 4.70551        | PEL        | 4726        |
| chr1       | 188076020     | rs4651434  | AL136372.2 | 3             | INTRON | 93247             | 3.83903        | CLM        | 255134      |
| chr1       | 205027737     | rs2275697  | CNTN2      | 5             | EXON   | 15485             | 3.53278        | PEL        | 14785       |
| chr2       | 3404845       | rs12476309 | TRAPPC12   | 2             | INTRON | 21388             | 3.45232        | MXL        | 35301       |
| chr2       | 3404845       | rs12476309 | TRAPPC12   | 2             | INTRON | 21388             | 3.8123         | PEL        | 10453       |
| chr2       | 28205581      | rs7577342  | BABAM2     | 4             | INTRON | 91922             | 3.33967        | PEL        | 15831       |
| chr2       | 46232372      | rs2595222  | PRKCE      | 8             | INTRON | 353459            | 3.65082        | PEL        | 15157       |
| chr2       | 54056574      | rs805439   | GPR75-ASB3 | 1             | INTRON | 30723             | 4.09045        | CLM        | NA          |
| chr2       | 74690378      | rs1063588  | MOGS       | 3             | EXON   | 2159              | 4.23914        | PUR        | 11443       |
| chr2       | 74690378      | rs1063588  | MOGS       | 3             | EXON   | 2159              | 3.98976        | CLM        | 9977        |
| chr2       | 152574284     | rs4413159  | NEB        | 9             | INTRON | 16717             | 3.97729        | MXL        | 17941       |
| chr2       | 152574284     | rs4413159  | NEB        | 9             | INTRON | 16717             | 3.96237        | CLM        | 17417       |
| chr2       | 159249741     | rs10190089 | CCDC148    | 1             | INTRON | 63524             | 4.00002        | PEL        | 3684        |
| chr2       | 159423872     | rs10933492 | PKP4       | 2             | INTRON | 110261            | 3.6859         | PEL        | 4099        |
| chr2       | 159439965     | rs6437190  | PKP4       | 3             | INTRON | 126354            | 3.68084        | PEL        | 4099        |
| chr2       | 159447318     | rs2108217  | PKP4       | 3             | INTRON | 133707            | 3.68084        | PEL        | 4099        |
| chr2       | 159460150     | rs1476672  | PKP4       | 4             | INTRON | 146539            | 3.68073        | PEL        | 4099        |
| chr2       | 159466149     | rs3771643  | PKP4       | 4             | INTRON | 152538            | 3.63611        | MXL        | 11843       |
| chr2       | 159525930     | rs2158831  | PKP4       | 16            | INTRON | 212319            | 3.77177        | MXL        | 16184       |
| chr2       | 178492722     | rs6730406  | PDE11A     | 20            | EXON   | 444760            | 3.91272        | CLM        | 11404       |
| chr2       | 178493770     | rs6734426  | PDE11A     | 20            | EXON   | 443712            | 3.83258        | MXL        | 11404       |
| chr2       | 178498015     | rs10469714 | PDE11A     | 19            | INTRON | 439467            | 4.03356        | CLM        | 11404       |
| chr2       | 178498015     | rs10469714 | PDE11A     | 19            | INTRON | 439467            | 3.49699        | MXL        | 11404       |
| chr2       | 206144833     | rs7606468  | PAR3B      | 16            | INTRON | 734110            | 3.51346        | PEL        | 3251        |
| chr3       | 24929802      | rs10865801 | AC092422.1 | 4             | INTRON | 200392            | 3.89337        | PEL        | 16051       |
| chr3       | 25173349      | rs6804502  | AC092422.1 | 5             | INTRON | 443939            | 3.67658        | MXL        | 13822       |
| chr3       | 45993606      | rs4682799  | FYCO1      | 14            | INTRON | 43701             | 3.91366        | MXL        | 17010       |
| chr3       | 45993606      | rs4682799  | FYCO1      | 14            | INTRON | 43701             | 3.49043        | PEL        | 8763        |
| chr3       | 45993973      | rs1552489  | FYCO1      | 14            | INTRON | 43334             | 4.02788        | CLM        | 97503       |
| chr3       | 45993973      | rs1552489  | FYCO1      | 14            | INTRON | 43334             | 4.19675        | MXL        | 17010       |
| chr3       | 45993973      | rs1552489  | FYCO1      | 14            | INTRON | 43334             | 3.78582        | PEL        | 8763        |
| chr3       | 118656515     | rs7633584  | IGSF11     | 1             | INTRON | 167553            | 3.30479        | PEL        | NA          |
| chr3       | 124385942     | rs2289420  | KALRN      | 14            | EXON   | 82436             | 3.57441        | MXL        | 227202      |
| chr3       | 133499063     | rs4854762  | TF         | 17            | EXON   | 34263             | 3.63379        | MXL        | 109870      |
| chr3       | 157077929     | rs2173824  | AC092944.1 | 2             | INTRON | 184871            | 3.31738        | PEL        | 18968       |
| chr3       | 173817935     | rs6799153  | NLGN1      | 3             | INTRON | 515590            | 3.82999        | CLM        | 20485       |
| chr3       | 173841089     | rs9862758  | NLGN1      | 3             | INTRON | 538744            | 3.43014        | MXL        | 17582       |
| chr4       | 39301334      | rs3733284  | RFC1       | 21            | INTRON | 66637             | 3.41794        | MXL        | 12645       |
| chr4       | 60041409      | rs2334163  | AC108517.1 | 1             | INTRON | 22857             | 3.43724        | MXL        | 58662       |
| chr4       | 102945076     | rs2631265  | AP002075.1 | 2             | INTRON | 12984             | 3.3257         | PEL        | 89705       |
| chr4       | 114058447     | rs7664966  | ANK2       | 1             | INTRON | 87562             | 3.32157        | PEL        | 6923        |
| chr4       | 137878262     | rs17049175 | LINC02511  | 2             | INTRON | 255691            | 3.41916        | MXL        | 82924       |
| chr4       | 137886834     | rs7695609  | LINC02511  | 2             | INTRON | 247119            | 3.41916        | MXL        | 82924       |
| chr5       | 7924914       | rs179171   | AC025174.1 | 1             | INTRON | 509               | 3.75623        | PEL        | 13661       |
| chr5       | 117569606     | rs1479219  | LINC02147  | 1             | INTRON | 46444             | 3.37708        | PEL        | 6639        |
| chr5       | 159072451     | rs10515793 | AC008691.1 | 3             | INTRON | 92441             | 3.52617        | MXL        | 14772       |
| chr5       | 164490804     | rs4571494  | AC109466.1 | 2             | INTRON | 90310             | 3.35525        | PEL        | 28493       |
| chr5       | 167941990     | rs7709842  | RARS       | 12            | INTRON | 28540             | 3.54993        | PEL        | 16347       |
| chr5       | 168108856     | rs12521041 | SLIT3      | 32            | INTRON | 618930            | 3.35108        | PEL        | 108102      |
| chr6       | 21819640      | rs2208882  | CASC15     | 6             | INTRON | 154637            | 3.50628        | MXL        | 68769       |
| chr6       | 22012236      | rs12203803 | CASC15     | 3             | INTRON | 113285            | 3.94623        | MXL        | 201895      |
| chr6       | 33670406      | rs7759668  | UQC22      | 1             | INTRON | 9098              | 3.68015        | MXL        | 30561       |
| chr6       | 33699882      | rs4713670  | IP6K3      | 2             | INTRON | 14800             | 3.56953        | MXL        | 30561       |
| chr6       | 51617581      | rs17753015 | PKHD1      | 57            | INTRON | 334827            | 3.5784         | MXL        | 19691       |
| chr6       | 51894955      | rs9370092  | PKHD1      | 29            | INTRON | 57453             | 3.50579        | PEL        | 9031        |
| chr6       | 51896569      | rs2435315  | PKHD1      | 29            | INTRON | 55839             | 3.50579        | PEL        | 9031        |
| chr6       | 129432235     | rs7738316  | LAMA2      | 4             | INTRON | 227893            | 3.50753        | MXL        | 9863        |
| chr6       | 158304083     | rs7741141  | SNX9       | 4             | INTRON | 59787             | 3.47833        | PEL        | 6025        |
| chr6       | 158412832     | rs10945973 | SYNJ2      | 1             | INTRON | 9913              | 3.35056        | PEL        | 8073        |
| chr6       | 159172854     | rs3123094  | SYTL3      | 11            | INTRON | 90503             | 3.3242         | PEL        | 8638        |
| chr6       | 159225284     | rs3127194  | EZR        | 1             | INTRON | 13975             | 3.55612        | PEL        | 8638        |
| chr7       | 11272690      | rs2107379  | AC004160.1 | 1             | INTRON | 35756             | 3.71813        | PEL        | 8575        |

|       |           |            |            |    |        |        |         |     |        |
|-------|-----------|------------|------------|----|--------|--------|---------|-----|--------|
| chr7  | 38500353  | rs2392577  | AMPH       | 11 | INTRON | 170667 | 3.80947 | PEL | 52771  |
| chr7  | 38500421  | rs2392578  | AMPH       | 11 | INTRON | 170599 | 4.70202 | PEL | 52771  |
| chr7  | 38551053  | rs10249892 | AMPH       | 2  | INTRON | 119967 | 3.42387 | MXL | 709029 |
| chr7  | 38551053  | rs10249892 | AMPH       | 2  | INTRON | 119967 | 3.78347 | PEL | NA     |
| chr7  | 42072483  | rs846334   | GLI3       | 7  | INTRON | 204129 | 3.30612 | PEL | 13180  |
| chr7  | 103781481 | rs194856   | ORC5       | 12 | INTRON | 67014  | 3.83665 | MXL | 42464  |
| chr7  | 111199127 | rs4591961  | IMMP2L     | 2  | INTRON | 3446   | 4.3777  | CLM | 16266  |
| chr7  | 131995999 | rs3906454  | PLXNA4     | 3  | INTRON | 265324 | 3.43946 | PEL | 11844  |
| chr7  | 133328222 | rs10235846 | EXOC4      | 10 | INTRON | 390393 | 3.68019 | PEL | 11052  |
| chr7  | 133340630 | rs2345943  | EXOC4      | 10 | INTRON | 402801 | 3.32348 | PEL | 11052  |
| chr7  | 133345635 | rs7776986  | EXOC4      | 10 | INTRON | 407806 | 3.30648 | PEL | 11052  |
| chr7  | 133585386 | rs6971638  | EXOC4      | 12 | INTRON | 647557 | 3.59095 | PEL | 10900  |
| chr7  | 133589608 | rs6956135  | EXOC4      | 12 | INTRON | 651779 | 3.59095 | PEL | 10900  |
| chr7  | 136426247 | rs7796504  | AC009264.1 | 3  | INTRON | 422773 | 3.98583 | PEL | 9398   |
| chr7  | 138617682 | rs17160621 | KIAA1549   | 1  | INTRON | 48382  | 3.58448 | PEL | 5098   |
| chr7  | 142558133 | rs8177123  | EPHB6      | 1  | INTRON | 5267   | 4.66453 | CLM | 7327   |
| chr7  | 142581288 | rs4987613  | AC245427.1 | 1  | INTRON | 7699   | 4.23981 | PUR | 12622  |
| chr7  | 142581288 | rs4987613  | AC245427.1 | 1  | INTRON | 7699   | 4.25124 | CLM | 7327   |
| chr7  | 142617214 | rs4252461  | TRPV5      | 8  | INTRON | 13691  | 4.07119 | CLM | 7327   |
| chr8  | 4625732   | rs10503276 | CSMD1      | 1  | INTRON | 226491 | 3.3141  | PEL | 15739  |
| chr8  | 9460449   | rs4841179  | TNKS       | 2  | INTRON | 47025  | 4.22429 | PUR | 30137  |
| chr8  | 9462583   | rs7832096  | TNKS       | 2  | INTRON | 49159  | 4.15546 | PUR | 30137  |
| chr8  | 9471060   | rs4240626  | TNKS       | 2  | INTRON | 57636  | 4.15546 | PUR | 30137  |
| chr8  | 9571621   | rs7461939  | TNKS       | 11 | INTRON | 158197 | 3.86031 | CLM | 27121  |
| chr8  | 94600795  | rs4430060  | LINC00535  | 5  | INTRON | 111866 | 3.43416 | PEL | 95210  |
| chr8  | 108472213 | rs16876325 | ANGPT1     | 1  | INTRON | 38070  | 3.73527 | PEL | 53916  |
| chr8  | 108492240 | rs1433171  | ANGPT1     | 1  | INTRON | 18043  | 3.70233 | PEL | 68048  |
| chr9  | 71762766  | rs10781440 | TJP2       | 1  | INTRON | 26380  | 3.54517 | MXL | 20253  |
| chr9  | 126355960 | rs10986067 | DENND1A    | 10 | INTRON | 336471 | 3.52364 | MXL | 16120  |
| chr10 | 20428197  | rs4237353  | PLXDC2     | 3  | INTRON | 95948  | 3.33044 | PEL | NA     |
| chr10 | 21140255  | rs703088   | NEBL       | 10 | INTRON | 46276  | 3.53426 | MXL | 91411  |
| chr10 | 59742330  | rs2939583  | MRPS35P3   | 1  | EXON   | 285    | 3.40877 | MXL | 6936   |
| chr10 | 64412122  | rs2393908  | AC024598.1 | 5  | INTRON | 278171 | 4.8568  | PEL | 9639   |
| chr10 | 65626259  | rs1916437  | AC022387.1 | 2  | INTRON | 201835 | 3.44572 | PEL | 5876   |
| chr10 | 68909644  | rs10762143 | CTNNA3     | 7  | INTRON | 546283 | 4.1173  | PEL | 12260  |
| chr10 | 70960448  | rs7893492  | SUPV3L1    | 11 | INTRON | 20460  | 3.53846 | PEL | 10102  |
| chr10 | 10669540  | rs10840455 | MRW1       | 2  | INTRON | 45759  | 3.41158 | MXL | 73155  |
| chr11 | 83123304  | rs2510475  | AP000446.1 | 3  | INTRON | 126133 | 3.82585 | PEL | 10558  |
| chr12 | 1483235   | rs12425175 | ERC1       | 15 | INTRON | 382831 | 3.45477 | PEL | 3161   |
| chr12 | 1483296   | rs11061721 | ERC1       | 15 | INTRON | 382892 | 3.45477 | PEL | 3161   |
| chr12 | 88953326  | rs3782179  | KITLG      | 1  | INTRON | 20912  | 4.64881 | BR  | 15484  |
| chr12 | 88953326  | rs3782179  | KITLG      | 1  | INTRON | 20912  | 4.78707 | PUR | 12182  |
| chr12 | 88953326  | rs3782179  | KITLG      | 1  | INTRON | 20912  | 3.49113 | PEL | 5118   |
| chr12 | 88956400  | rs11104952 | KITLG      | 1  | INTRON | 17838  | 4.88227 | BR  | 15484  |
| chr12 | 88956400  | rs11104952 | KITLG      | 1  | INTRON | 17838  | 4.78675 | PUR | 12182  |
| chr12 | 88956400  | rs11104952 | KITLG      | 1  | INTRON | 17838  | 3.49113 | PEL | 5118   |
| chr12 | 108872988 | rs4964714  | LINC01498  | 3  | INTRON | 13374  | 3.73314 | PEL | 8851   |
| chr12 | 114399157 | rs12425509 | RBM19      | 2  | INTRON | 5019   | 3.6908  | PEL | 21598  |
| chr12 | 117423264 | rs7131746  | AC127164.1 | 1  | INTRON | 1878   | 3.8611  | CLM | 5042   |
| chr12 | 117423264 | rs7131746  | AC127164.1 | 1  | INTRON | 1878   | 3.88194 | MXL | 5042   |
| chr12 | 126895508 | rs10744253 | AC007368.1 | 9  | INTRON | 219811 | 3.46532 | MXL | 6162   |
| chr12 | 126905611 | rs11613705 | AC007368.1 | 9  | INTRON | 229914 | 4.03659 | MXL | 6171   |
| chr13 | 39682032  | rs2324129  | AL354809.1 | 1  | INTRON | 54823  | 3.40691 | PEL | 12096  |
| chr13 | 39787406  | rs7324440  | AL354809.1 | 2  | INTRON | 160197 | 3.31384 | PEL | 7058   |
| chr13 | 101002920 | rs1888839  | PCCA       | 18 | INTRON | 261651 | 3.4116  | MXL | 47287  |
| chr13 | 114495335 | rs7491764  | TMEM255B   | 3  | INTRON | 24226  | 4.26395 | CLM | NA     |
| chr13 | 114495335 | rs7491764  | TMEM255B   | 3  | INTRON | 24226  | 5.35662 | PUR | NA     |
| chr13 | 114495335 | rs7491764  | TMEM255B   | 3  | INTRON | 24226  | 4.58873 | MXL | NA     |
| chr14 | 25284005  | rs898766   | STXBP6     | 5  | INTRON | 235498 | 4.24069 | MXL | 10358  |
| chr14 | 25284005  | rs898766   | STXBP6     | 5  | INTRON | 235498 | 3.41304 | PEL | 6808   |
| chr14 | 27179913  | rs12435522 | LINC02588  | 1  | INTRON | 73466  | 3.53235 | MXL | 5940   |
| chr14 | 69543224  | rs10145565 | DCAF5      | 6  | INTRON | 76619  | 3.47568 | PEL | 10305  |
| chr15 | 36327528  | rs4502172  | AC021351.1 | 2  | INTRON | 216930 | 3.87935 | PEL | 3916   |
| chr15 | 40059535  | rs12440567 | FSIP1      | 3  | INTRON | 15496  | 3.81376 | PEL | NA     |
| chr15 | 43039063  | rs7175582  | TTBK2      | 14 | INTRON | 173614 | 3.38804 | PEL | 18700  |
| chr15 | 45050593  | rs2290331  | TRIM69     | 3  | INTRON | 22033  | 4.4346  | PUR | 9358   |
| chr15 | 57894443  | rs7178159  | GCOM1      | 1  | INTRON | 10212  | 3.80653 | MXL | 58566  |
| chr15 | 58246768  | rs3204690  | ALDH1A2    | 13 | EXON   | 111848 | 3.60967 | PEL | 10605  |
| chr15 | 78334655  | rs11634607 | TBC1D2B    | 3  | INTRON | 35339  | 3.76965 | PEL | 8661   |
| chr15 | 100974315 | rs1966764  | CERS3      | 12 | INTRON | 110610 | 3.36747 | PEL | 12239  |
| chr16 | 11193930  | rs3893660  | CLEC16A    | 18 | INTRON | 155492 | 3.80614 | PEL | 5595   |
| chr16 | 63093010  | rs7203144  | AC040174.1 | 4  | INTRON | 70548  | 3.50044 | MXL | 16302  |
| chr16 | 72694352  | rs1429433  | LINC01572  | 1  | INTRON | 4551   | 3.83997 | PEL | 7941   |
| chr16 | 78524099  | rs2738710  | WVOX       | 4  | INTRON | 390548 | 3.38544 | MXL | 8679   |
| chr16 | 78524099  | rs2738710  | WVOX       | 4  | INTRON | 390548 | 4.22091 | CLM | 7537   |
| chr17 | 55437411  | rs703859   | MSI2       | 5  | INTRON | 103516 | 3.39257 | MXL | 12985  |
| chr18 | 11765356  | rs8094039  | GNAL       | 5  | INTRON | 13849  | 3.57292 | MXL | 5047   |
| chr18 | 11774500  | rs2161961  | GNAL       | 5  | INTRON | 22993  | 3.55793 | MXL | 5047   |
| chr18 | 29797921  | rs616114   | GAREM1     | 1  | INTRON | 69137  | 3.36921 | PEL | 12267  |
| chr18 | 50622857  | rs9957443  | DCC        | 6  | INTRON | 344325 | 3.447   | PEL | 8928   |
| chr18 | 53727502  | rs2535724  | AC006305.1 | 3  | INTRON | 130991 | 3.90342 | CLM | 251231 |
| chr18 | 55355822  | rs17759405 | AC027097.2 | 2  | INTRON | 49135  | 3.54755 | MXL | 56547  |
| chr19 | 33581219  | rs12608825 | GPATCH1    | 2  | INTRON | 9433   | 3.43519 | PEL | 17443  |

|       |          |            |         |   |        |        |         |     |       |
|-------|----------|------------|---------|---|--------|--------|---------|-----|-------|
| chr20 | 34190870 | rs3746410  | FER1L4  | 6 | INTRON | 2378   | 3.39706 | MXL | 10278 |
| chr20 | 42882209 | rs6031477  | GDAP1L1 | 1 | INTRON | 6322   | 3.72565 | PEL | 21411 |
| chr20 | 52567546 | rs11086446 | BCAS1   | 9 | INTRON | 119538 | 3.66912 | PEL | 19877 |
| chr21 | 38306954 | rs2835537  | HLCS    | 5 | INTRON | 55582  | 3.44629 | MXL | 6745  |
| chr21 | 38323528 | rs2835545  | HLCS    | 2 | INTRON | 39008  | 3.44629 | MXL | 6745  |
| chr21 | 41161654 | rs760285   | IGSF5   | 6 | INTRON | 44320  | 4.00826 | MXL | 7914  |
| chr21 | 41161654 | rs760285   | IGSF5   | 6 | INTRON | 44320  | 3.85064 | PEL | 7894  |
| chr22 | 19483898 | rs2073759  | CDC45   | 7 | INTRON | 16549  | 4.02527 | CLM | 34320 |
| chr22 | 28833502 | rs695388   | TTC28   | 2 | INTRON | 242351 | 3.30197 | PEL | 70060 |
| chr22 | 49123661 | rs6587310  | FAM19A5 | 3 | INTRON | 238257 | 3.32571 | PEL | 17822 |
