# Supplementary material
Source: Oxford University Press journal article supplement (doi:10.1093/g3journal_jkac111)
Supplement: jkac111_supplemental_table_s4.pdf [file jkac111_supplemental_table_s4.pdf]

|       |          |            |            |            |        |         |         |     |        |
|-------|----------|------------|------------|------------|--------|---------|---------|-----|--------|
| chr15 | 58245151 | rs4646645  | ALDH1A2    | DOWNSTREAM | 471    | 112970  | 3.73158 | PEL | 10605  |
| chr15 | 68109907 | rs28670272 | SKOR1      | UPSTREAM   | 2135   | -2135   | 4.12896 | MXL | 35875  |
| chr16 | 79513098 | rs11150167 | AC084064.1 | UPSTREAM   | 26402  | -26402  | 3.4833  | MXL | 26306  |
| chr17 | 50309871 | rs12949235 | snoZ178    | UPSTREAM   | 6164   | 6253    | 4.40216 | CLM | 264600 |
| chr17 | 69926024 | rs9905128  | AC005144.1 | UPSTREAM   | 58133  | -58133  | 3.3917  | MXL | 37597  |
| chr18 | 58676641 | rs7233376  | AC113137.1 | UPSTREAM   | 106682 | -106682 | 3.7861  | PEL | 120535 |
| chr18 | 68654632 | rs11151626 | AC090415.2 | DOWNSTREAM | 13081  | 24094   | 3.45655 | MXL | 12979  |
| chr20 | 12661944 | rs6041542  | LINC01722  | DOWNSTREAM | 183906 | 271223  | 3.29462 | PEL | 7377   |
| chr20 | 12666256 | rs6078720  | LINC01722  | DOWNSTREAM | 179594 | 266911  | 3.52848 | PEL | 7377   |
| chr20 | 44311354 | rs4810465  | WFDC10B    | DOWNSTREAM | 1938   | 22304   | 3.84941 | PEL | 15146  |
| chr21 | 17069166 | rs2823455  | RAD23BP3   | PROMOTER   | 266    | -266    | 3.81976 | MXL | 6778   |
| chr22 | 44769667 | rs4823354  | Z85994.1   | DOWNSTREAM | 7503   | 8236    | 3.31273 | PEL | 3260   |
